# Supplementary material
Source: publisher figshare collection journal article supplement (https://brill.figshare.com/ndownloader/files/36190851)
Supplement: Supplementary file 1 [file 36190851]

## Sheet: measurements
Species	Code	Country	Caste	HW	HL	EL	SL	WL	PrW	MsW	MsL	PW	PH	PL	GL	A3L	A4L	A3W	A4W	TLa	TLr	CI	OI	SI	MsI	LPI	DPI
goj	DZUP549444	Brazil	w	2.19386	2.49998	0.66326	1.93876	3.72446	1.63264	0.96938	0.86734	1.17346	1.2755	1.12244	5.102	1.42856	1.47958	1.73468	1.88774	10.255	12.4489	87.7551	30.2326	88.3721	111.765	88	104.545
goj_nr	AT355	Brazil	w	1.7857	2.14284	0.56122	1.58162	3.23977	1.30101	0.84183	0.68877	1.0204	1.07142	0.96938	2.90814	1.17346	1.32652	1.5306	1.68366	8.85197	9.26013	83.3333	31.4286	88.5714	122.222	90.4762	105.263
goj_nr	AT2190	Brazil	w	1.83672	2.09182	0.56122	1.68366	3.26528	1.32652	0.91836	0.7653	1.07142	1.07142	0.91836	3.46936	1.22448	1.42856	1.58162	1.68366	8.9285	9.74482	87.8049	30.5556	91.6667	120	85.7143	116.667
goj_nr	AT232	Brazil	w	1.73468	2.19386	0.56122	1.73468	3.3163	1.32652	0.89285	0.7653	1.04591	1.07142	0.81632	4.13262	1.09693	1.35203	1.5306	1.70917	8.77544	10.4591	79.0698	32.3529	100	116.667	76.1905	128.125
com	AT115	Brazil	w	3.09338	3.5595	1.017	3.729	5.67825	2.28825	1.5255	1.1865	1.31363	1.77975	1.356	6.78	2.45775	2.2035	2.58488	2.79675	15.255	17.3738	86.9048	32.8767	120.548	128.571	76.1905	96.875
com	AT234	Brazil	w	3.13575	3.729	1.017	3.64425	5.5935	2.45775	1.65263	1.27125	1.31363	1.8645	1.44075	8.475	2.45775	2.28825	2.79675	2.712	15.5093	19.2383	84.0909	32.4324	116.216	130	77.2727	91.1765
com	ATPFOR1973	Brazil	w	3.09338	3.68663	0.93225	3.39	5.5935	2.41538	1.61025	1.14413	1.27125	1.8645	1.48313	6.35625	2.28825	2.2035	2.712	2.712	15.255	17.1195	83.908	30.137	109.589	140.741	79.5455	85.7143
com	AT2335	Brazil	w	3.13575	3.68663	0.93225	3.47475	5.63588	2.41538	1.61025	1.22888	1.27125	1.82213	1.44075	6.69525	2.373	2.28825	2.75438	2.712	15.4245	17.4585	85.0575	29.7297	110.811	131.034	79.0698	88.2353
com	AT1017	Brazil	w	3.051	3.729	1.017	3.51713	5.67825	2.45775	1.73738	1.27125	1.356	1.94925	1.44075	5.9325	2.373	2.28825	2.8815	2.8815	15.5092	16.7805	81.8182	33.3333	115.278	136.667	73.913	94.1176
com	temp106	Perú	w	2.96625	3.5595	1.017	3.51713	5.63588	2.45775	1.61025	1.1865	1.356	1.77975	1.39838	5.50875	2.28825	2.2035	2.79675	2.79675	15.0855	16.1025	83.3333	34.2857	118.571	135.714	78.5714	96.9697
com	temp122	Brazil	q	3.39	3.94088	1.10175	3.81375	6.78	2.92388	2.712	3.39	1.61025	2.28825	1.5255	7.797	2.79675	2.8815	3.5595	3.51713	17.9246	20.0434	86.0215	32.5	112.5	80	66.6667	105.556
com	temp110	Brazil	q	3.39	3.8985	1.017	3.729	5.84775	2.66963	2.2035	2.79675	1.44075	1.94925	1.5255	5.84775	2.50013	2.45775	3.09338	3.051	16.2296	17.1195	86.9565	30	110	78.7879	78.2609	94.4444
com	temp89	Brazil	w	2.96625	3.5595	0.974625	3.64425	5.5935	2.373	1.61025	1.22888	1.27125	1.77975	1.44075	5.2545	2.2035	2.2035	2.712	2.712	15.0008	15.8483	83.3333	32.8571	122.857	131.034	80.9524	88.2353
com	temp9	Brazil	w	3.17813	3.729	0.974625	3.64425	5.67825	2.45775	1.695	1.27125	1.31363	1.8645	1.44075	6.35625	2.373	2.28825	2.83913	2.79675	15.5092	17.2043	85.2273	30.6667	114.667	133.333	77.2727	91.1765
com	AT2318	Brazil	m	2.0408	2.0408	1.0204	0.48469	4.99996	2.0408	2.2959	2.95916	1.09693	1.42856	1.07142	5.8673	2.14284	1.93876	2.0408	2.19386	12.1938	13.9795	100	50	23.75	77.5862	75	102.381
com	temp59	Brazil	m	1.93645	2.19041	1.07933	0.44443	5.14269	2.15866	2.28564	3.04752	1.07933	1.46027	1.14282	6.9839	1.96819	1.9047	2.15866	2.28564	12.3488	15.4598	88.4058	55.7377	22.9508	75	78.2609	94.4444
com	AT2336	Colombia	m	1.96819	2.15866	1.01584	0.44443	4.95222	2.03168	2.28564	3.04752	1.11108	1.39678	1.14282	5.52363	1.84121	1.9047	2.09517	2.22215	11.9996	13.7773	91.1765	51.6129	22.5806	75	81.8182	97.2222
mas	AT203	Brazil	w	0.953125	1.3125	0.265625	0.8125	1.65625	0.75	0.40625	0.359375	0.484375	0.578125	0.5625	1.71875	0.625	0.71875	0.71875	0.796875	4.875	5.25	72.619	27.8689	85.2459	113.043	97.2973	86.1111
mas	AT2206	Brazil	w	0.875	1.1875	0.25	0.75	1.70312	0.65625	0.375	0.296875	0.4375	0.546875	0.5	1.8125	0.59375	0.6875	0.59375	0.671875	4.67188	5.20312	73.6842	28.5714	85.7143	126.316	91.4286	87.5
mas	MEPN40094	Ecuador	w	0.890625	1.21875	0.25	0.75	1.73438	0.65625	0.375	0.3	0.30625	0.53125	0.515625	1.9375	0.5625	0.6875	0.65625	0.734375	4.71875	5.40625	73.0769	28.0702	84.2105	125	97.0588	59.3939
mas	DZUP549408	French Guiana	w	1.10214	1.51034	0.32656	1.01234	2.08182	0.89804	0.48984	0.46943	0.55107	0.63271	0.63271	2.36756	0.77558	0.85722	0.808236	0.89804	5.85767	6.59243	72.973	29.6296	91.8519	104.348	100	87.0968
mas	AT182	Brazil	w	1.21875	1.625	0.375	1.0625	2.3375	0.9375	0.5625	0.4375	0.625	0.71875	0.671875	2.28125	0.84375	0.90625	0.921875	1	6.38438	6.91563	75	30.7692	87.1795	128.571	93.4783	93.0233
mas	AT1014.1	French Guiana	w	1.25726	1.65321	0.36738	1.08173	2.40838	0.93886	0.583726	0.48984	0.63271	0.73476	0.65312	2.57166	0.824564	0.89804	0.93886	1.03275	6.43731	7.28637	76.0494	29.2208	86.039	119.167	88.8889	96.875
mas	AT216	Ecuador	w	1.30624	1.71444	0.36738	1.14296	2.49002	1.0205	0.63271	0.53066	0.69394	0.77558	0.71435	2.69412	0.85722	1.0205	0.95927	1.08173	6.79653	7.61293	76.1905	28.125	87.5	119.231	92.1053	97.1429
mas	MPEG3020126	Brazil	w	1.34706	1.71444	0.383708	1.15521	2.57166	1.0205	0.6123	0.48984	0.73476	0.75517	0.69394	2.97986	0.93886	1.0205	1.04091	1.14296	6.9394	7.9599	78.5714	28.4848	85.7576	125	91.8919	105.882
mas	AT1014.2	French Guiana	w	1.4287	1.79608	0.4082	1.2246	2.57166	1.10214	0.65312	0.57148	0.73476	0.8164	0.73476	2.77576	0.97968	1.10214	1.10214	1.18378	7.18432	7.87826	79.5455	28.5714	85.7143	114.286	90	100
mas	JTL9239	Costa Rica	w	1.3389	1.71444	0.4082	1.26542	2.57166	1.06132	0.669448	0.59189	0.791908	0.824564	0.73476	2.93904	0.975598	1.0205	1.06132	1.19603	7.01696	7.9599	78.0952	30.4878	94.5122	113.103	89.1089	107.778
mas	AT2198	French Guiana	w	1.38788	1.8369	0.4082	1.24501	2.57166	1.10214	0.65312	0.55107	0.75517	0.8164	0.77558	3.22478	0.93886	1.04091	1.06132	1.16337	7.16391	8.40892	75.5556	29.4118	89.7059	118.519	95	97.3684
mas	AT188.1	Brazil	w	1.40829	1.8369	0.4082	1.2246	2.6533	1.0205	0.65312	0.51025	0.726596	0.69394	0.73476	2.8574	0.97968	1.06132	1.06132	1.16337	7.26596	8.08236	76.6667	28.9855	86.9565	128	105.882	98.8889
mas	ATPFOR2010	Brazil	w	1.61239	2.041	0.48984	1.38788	2.73494	1.18378	0.69394	0.6123	0.8164	0.97968	0.91845	3.22478	1.14296	1.26542	1.2246	1.34706	8.10277	8.91917	79	30.3797	86.0759	113.333	93.75	88.8889
mas	MEPN38315.1	Ecuador	w	1.46952	1.91854	0.4082	1.34706	2.8574	1.18378	0.77558	0.59189	0.89804	0.89804	0.77558	3.38806	1.14296	1.14296	1.24501	1.38788	7.83744	8.93958	76.5957	27.7778	91.6667	131.034	86.3636	115.789
mas	AT183	Brazil	w	1.59198	2.00018	0.44902	1.38788	3.0615	1.20011	0.747006	0.6123	0.93886	0.97968	0.85722	2.73494	1.10214	1.18378	1.28583	1.36747	8.20482	8.65384	79.5918	28.2051	87.1795	122	87.5	109.524
mas	AT2190	Brazil	w	1.8369	2.20428	0.53066	1.71444	3.30642	1.2246	0.85722	0.77558	1.04091	0.97968	0.89804	3.42888	1.2246	1.38788	1.57157	1.71444	9.02122	9.83762	83.3333	28.8889	93.3333	110.526	91.6667	115.909
mas	AT1014	French Guiana	q	2.14284	2.551	0.63775	1.73468	4.0816	1.83672	1.63264	2.21937	1.17346	1.47958	1.07142	4.3367	1.7857	1.73468	2.0408	2.14284	11.2244	12.0407	84	29.7619	80.9524	73.5632	72.4138	109.524
mas	temp23	Brazil	w	1.39062	1.78125	0.40625	1.21875	2.5	1.0625	0.59375	0.5625	0.765625	0.78125	0.6875	2.5	1.01562	1.0625	1.0625	1.1875	7.04688	7.46875	78.0702	29.2135	87.6404	105.556	88	111.364
mas	temp20	Brazil	w	1.21875	1.6875	0.375	1.09375	2.375	1	0.59375	0.46875	0.65625	0.78125	0.6875	2.5625	0.90625	0.96875	0.90625	1.0625	6.625	7.3125	72.2222	30.7692	89.7436	126.667	88	95.4545
mas	temp41	Perú	q	1.95936	2.28592	0.6123	1.46952	3.6738	1.6328	1.2246	1.97977	1.18378	1.4287	0.97968	4.2861	1.30624	1.38788	1.46952	1.55116	9.63352	11.2255	85.7143	31.25	75	61.8557	68.5714	120.833
mas	temp107	Brazil	w	1.4375	1.78125	0.4375	1.28125	2.375	1.03125	0.75	0.5625	0.75	1.03125	0.71875	3.03125	0.96875	1.0625	1.15625	1.21875	6.90625	7.90625	80.7018	30.4348	89.1304	133.333	69.697	104.348
mas	AT1122	Brazil	w	1.6328	2.00018	0.48984	1.38788	2.8574	1.2246	0.77558	0.65312	0.89804	1.0205	0.8164	3.0615	1.10214	1.14296	1.10214	1.32665	7.91908	8.73548	81.6327	30	85	118.75	80	110
mas	AT2262	Panamá	w	1.57157	1.87772	0.44902	1.4287	2.97986	1.2246	0.87763	0.71435	0.93886	0.97968	0.79599	3.75544	1.06132	1.08173	1.34706	1.46952	7.79662	9.40901	83.6957	28.5714	90.9091	122.857	81.25	117.949
lae	ATPFOR1918	Brazil	w	1.58382	2.00018	0.44902	1.55116	2.81658	1.18378	0.73476	0.65312	0.8164	0.87763	0.8164	2.89822	1.10214	1.18378	1.2246	1.36747	7.91908	8.53138	79.1837	28.3505	97.9381	112.5	93.0233	100
lae	AT2386	Brazil	w	1.86223	2.19386	0.56122	1.68366	3.11222	1.40305	0.96938	0.81632	1.0204	1.12244	0.86734	4.3367	1.17346	1.32652	1.55611	1.68366	8.6734	10.5101	84.8837	30.137	90.411	118.75	77.2727	117.647
lae	ATPFOR1806	Brazil	w	1.4287	1.71444	0.4082	1.34706	2.49002	1.06132	0.69394	0.55107	0.69394	0.8164	0.73476	2.61248	0.97968	1.0205	1.06132	1.10214	6.9394	7.5517	83.3333	28.5714	94.2857	125.926	90	94.4444
lae	AT2204.1	Brazil	q	2.47611	2.79356	0.730135	2.12692	4.95222	2.28564	2.22215	2.79356	1.58725	1.58725	1.20631	6.60296	1.96819	1.96819	2.60309	2.73007	12.8885	15.5551	88.6364	29.4872	85.8974	79.5455	76	131.579
lae	AT2173	Brazil	q	2.41262	2.73007	0.730135	2.09517	4.69826	2.09517	2.19041	2.60309	1.68249	1.68249	1.07933	6.09504	2.09517	1.96819	2.5396	2.69833	12.571	14.6027	88.3721	30.2632	86.8421	84.1463	64.1509	155.882
lae	AT2173.1	Brazil	w	1.44911	1.75526	0.42861	1.34706	2.4492	0.93886	0.69394	0.57148	0.73476	0.77558	0.73476	3.14314	0.97968	0.97968	1.10214	1.18378	6.89858	8.08236	82.5581	29.5775	92.9577	121.429	94.7368	100
lae	AT2343	Brazil	w	1.57157	1.95936	0.48984	1.59198	2.8574	1.2246	0.87763	0.69394	0.91845	0.97968	0.8164	3.34724	1.10214	1.14296	1.36747	1.46952	7.87826	8.9804	80.2083	31.1688	101.299	126.471	83.3333	112.5
lae	ICN002018	Colombia	w	1.95936	2.16346	0.55107	1.77567	3.34724	1.4287	1.0205	0.83681	1.04091	1.16337	1.0205	3.83708	1.32665	1.34706	1.55116	1.6328	9.20491	10.3683	90.566	28.125	90.625	121.951	87.7193	102
lae	ATPFOR2040	French Guiana	w	1.8369	2.12264	0.55107	1.6328	3.14314	1.32665	0.93886	0.8164	0.93886	1.06132	0.8164	3.59216	1.10214	1.14296	1.46952	1.51034	8.32728	9.67434	86.5385	30	88.8889	115	76.9231	115
lae	temp56	Brazil	w	2.11733	2.44896	0.61224	1.93876	3.5714	1.5306	1.0204	0.96938	1.07142	1.24999	1.04591	4.3367	1.47958	1.47958	1.76019	1.63264	10.0254	11.403	86.4583	28.9157	91.5663	105.263	83.6735	102.439
lae	temp88	Brazil	w	1.87772	2.28592	0.53066	1.75526	3.2656	1.38788	1.0205	0.85722	1.04091	1.12255	0.91845	4.082	1.30624	1.34706	1.55116	1.6328	9.12327	10.552	82.1429	28.2609	93.4783	119.048	81.8182	113.333
lae	AT2245.2	Brazil	w	2.041	2.36756	0.6123	1.8369	3.30642	1.46952	1.04091	0.89804	1.04091	1.08173	0.91845	4.2861	1.2246	1.26542	1.6328	1.69403	9.08245	10.8785	86.2069	30	90	115.909	84.9057	113.333
mar	AT1013	Brazil	w	1.75526	2.20428	0.53066	1.67362	3.22478	1.12255	0.77558	0.65312	0.77558	1.0205	0.85722	3.79626	1.06132	1.32665	1.14296	1.2246	8.67425	10.0825	79.6296	30.2326	95.3488	118.75	84	90.4762
mar	AT248	Brazil	q	2.712	2.8815	0.678	1.94925	4.746	2.2035	1.94925	2.58488	1.44075	1.44075	1.10175	5.33925	1.90688	2.034	2.373	2.5425	12.6701	14.0685	94.1176	25	71.875	75.4098	76.4706	130.769
mar	temp34	Brazil	q	2.79356	2.85705	0.666645	1.96819	4.63477	2.09517	1.9047	2.63484	1.46027	1.46027	1.11108	6.03155	1.77772	1.84121	2.28564	2.47611	12.2218	14.6344	97.7778	23.8636	70.4545	72.2892	76.087	131.429
mar	AT2350	Brazil	q	2.5396	2.79356	0.6349	1.96819	4.4443	1.96819	1.77772	2.47611	1.33329	1.39678	0.95235	4.50779	1.80947	1.84121	2.28564	2.34913	11.8409	12.698	90.9091	25	77.5	71.7949	68.1818	140
mar	ATPFOR2011	Brazil	m	1.74598	1.9047	0.76188	0.349195	3.99987	1.84121	1.9047	2.60309	1.07933	1.33329	0.88886	5.0792	1.46027	1.58725	1.9047	2.15866	9.84095	11.8726	91.6667	43.6364	20	73.1707	66.6667	121.429
mar	AT1016	Brazil	q	2.66658	2.92054	0.666645	2.03168	4.63477	2.03168	1.9047	2.57134	1.46027	1.42853	1.01584	5.39665	1.84121	1.9047	2.34913	2.47611	12.3171	13.9678	91.3043	25	76.1905	74.0741	71.1111	143.75
mar	AT1016.2	Brazil	w	2.06343	2.34913	0.50792	1.58725	3.49195	1.46027	0.95235	0.920605	1.04758	1.14282	0.88886	3.68242	1.30155	1.42853	1.65074	1.77772	9.46001	10.4124	87.8378	24.6154	76.9231	103.448	77.7778	117.857
mar	AT1043	Brazil	q	2.73007	2.92054	0.730135	2.09517	4.25383	2.09517	1.9047	2.60309	1.46027	1.52376	1.01584	5.26967	1.80947	1.87296	2.31739	2.47611	11.8726	13.4599	93.4783	26.7442	76.7442	73.1707	66.6667	143.75
mar	AT2352	Brazil	w	2.14284	2.39794	0.5102	1.73468	2.90814	1.5306	0.96938	0.96938	1.12244	1.19897	0.91836	3.41834	1.32652	1.47958	1.68366	1.83672	9.03054	9.64278	89.3617	23.8095	80.9524	100	76.5957	122.222
mar	ATPFOR0906.1	Brazil	w	1.95936	2.2451	0.48984	1.59198	3.22478	1.38788	0.89804	0.8164	0.97968	1.0205	0.83681	4.2861	1.30624	1.30624	1.46952	1.6328	8.91917	10.5928	87.2727	25	81.25	110	82	117.073
mar	AT1083	Brazil	w	2.041	2.40838	0.48984	1.75526	3.4697	1.55116	0.87763	0.97968	1.04091	1.14296	0.85722	4.20446	1.38788	1.4287	1.55116	1.67362	9.55188	10.9398	84.7458	24	86	89.5833	75	121.429
mar	AT2128	Brazil	w	1.91854	2.2451	0.48984	1.6328	3.14314	1.38788	0.85722	0.8164	0.89804	0.97968	0.8164	3.0615	1.14296	1.18378	1.4287	1.59198	8.53138	9.26614	85.4545	25.5319	85.1064	105	83.3333	110
mar	AT284	Brazil	w	1.93895	2.20428	0.46943	1.59198	3.30642	1.40829	0.93886	0.85722	0.97968	1.14296	0.8164	3.4697	1.24501	1.28583	1.4287	1.59198	8.85794	9.7968	87.963	24.2105	82.1053	109.524	71.4286	120
mar	ATPFOR1988	Brazil	w	2.2451	2.57166	0.51025	1.87772	3.59216	1.65321	1.10214	0.97968	1.10214	1.18378	0.93886	5.1025	1.38788	1.51034	1.71444	1.87772	10.0009	12.2052	87.3016	22.7273	83.6364	112.5	79.3103	117.391
mar	AT907	Brazil	w	1.71444	1.95936	0.42861	1.46952	2.93904	1.24501	0.77558	0.65312	0.8164	0.93886	0.73476	2.89822	1.06132	1.16337	1.30624	1.48993	7.85785	8.53138	87.5	25	85.7143	118.75	78.2609	111.111
mar	AT224	Brazil	w	1.6328	1.85731	0.4082	1.26542	2.8574	1.2246	0.73476	0.65312	0.79599	0.85722	0.73476	3.14314	0.97968	1.06132	1.2246	1.38788	7.49047	8.59261	87.9121	25	77.5	112.5	85.7143	108.333
mar	AT242	Brazil	w	2.12264	2.32674	0.51025	1.51034	3.42888	1.4287	1.0205	0.89804	0.93886	1.10214	0.89804	3.51052	1.24501	1.32665	1.55116	1.73485	9.22532	10.1642	91.2281	24.0385	71.1538	113.636	81.4815	104.545
mar	AT2322	Brazil	w	1.59375	1.84375	0.390625	1.25	2.75	1.15625	0.71875	0.625	0.78125	0.875	0.71875	3.4375	1	1.09375	1.15625	1.3125	7.40625	8.75	86.4407	24.5098	78.4314	115	82.1429	108.696
mar	AT2156	Brazil	w	1.95936	2.28592	0.48984	1.67362	3.2656	1.4287	0.87763	0.89804	0.93886	0.97968	0.89804	4.57184	1.26542	1.38788	1.46952	1.6328	9.10286	11.0214	85.7143	25	85.4167	97.7273	91.6667	104.545
mar	DZUP549394	Brazil	w	1.95936	2.36756	0.53066	1.6328	3.38806	1.51034	0.95927	0.89804	0.97968	1.0205	0.93886	3.75544	1.30624	1.38788	1.53075	1.67362	9.3886	10.4499	82.7586	27.0833	83.3333	106.818	92	104.348
mar	DZUP549369	Brazil	w	2.00018	2.28592	0.48984	1.6328	3.34724	1.44911	0.97968	0.85722	0.93886	1.06132	0.89804	4.20446	1.30624	1.4287	1.46952	1.6328	9.26614	10.7357	87.5	24.4898	81.6327	114.286	84.6154	104.545
mar	AT210	Brazil	w	2.00018	2.06141	0.46943	1.46952	3.02068	1.30624	0.85722	0.73476	0.87763	0.93886	0.77558	3.51052	1.14296	1.26542	1.59198	1.59198	8.26605	9.36819	97.0297	23.4694	73.4694	116.667	82.6087	113.158
mas	MPEG03006223	Brazil	m	1.16365	1.3209	0.629	0.22015	2.8934	1.258	1.1951	1.7612	0.7548	0.8806	0.6919	4.403	0.9435	1.1951	1.1322	1.3209	7.0448	9.3092	88.0952	54.0541	18.9189	67.8571	78.5714	109.091
mas	ATPFOR2077	Brazil	m	1.1322	1.3838	0.629	0.2516	2.8934	1.4467	1.258	1.7612	0.7548	0.9435	0.7548	4.5288	1.0064	1.28945	1.1951	1.41525	7.32785	9.5608	81.8182	55.5556	22.2222	71.4286	80	100
mar	UFVLABECOL010414	Brazil	m	1.5096	1.72975	0.6919	0.3774	3.5224	1.9499	1.6983	2.23295	0.91205	1.1322	0.8177	5.9126	1.258	1.41525	1.5725	1.8241	8.7431	11.9825	87.2727	45.8333	25	76.0563	72.2222	111.538
mar	AT1016.1	Brazil	m	1.74598	1.9047	0.76188	0.349195	3.99987	2.15866	1.9047	2.5396	1.07933	1.33329	0.88886	5.0792	1.46027	1.58725	1.9047	2.15866	9.84095	11.8726	91.6667	43.6364	20	75	66.6667	121.429

## Sheet: key
com =	Neoponera commutata
goj =	Neoponera gojira sp. nov.
lae =	Neoponera laevigata
mar =	Neoponera marginata
mas =	Neoponera mashpi sp. nov.
goj_nr =	Neoponera nr. gojira
